# Supplementary material for: The Study of Bluetongue Virus (BTV) and Epizootic Hemorrhagic Disease Virus (EHDV) Circulation and Vectors at the Municipal Parks and Zoobotanical Foundation of Belo Horizonte, Minas Gerais, Brazil (FPMZB-BH)
Source: MDPI journal article supplement (doi:10.3390/v16020293), 2024-02-15
Supplement: s1 [file s1]

Supplementary Materials:

**Table S1.** Data for each *Culicoides* spp. capture

| ID  | Date        | Month | Sunset | Sunrise | maximum temperature (°C) | minimum temperature (°C) | average temperature (°C) | maximum humidity (%) | minimum humidity (%) | lunar phase     | Rain on the day | Average atmospheric pressure. (hPa) | Total <i>Culicoides</i> spp. collected |
|-----|-------------|-------|--------|---------|--------------------------|--------------------------|--------------------------|----------------------|----------------------|-----------------|-----------------|-------------------------------------|----------------------------------------|
| Z1  | 09/12-10/12 | Dez   | 18:28  | 05:09   | 28.1                     | 19.6                     | 23.8                     | 87                   | 45                   | Crescent        | N               | 1014                                | 25                                     |
| Z2  | 20/12-21/12 | Dez   | 18:34  | 05:13   | 28.9                     | 20.9                     | 24.9                     | 86                   | 53                   | Convex waning   | N               | 1014                                | 38                                     |
| Z3  | 04/01-05/01 | Jan   | 18:39  | 05:22   | 32.9                     | 21.5                     | 27.7                     | 99                   | 45                   | Crescent        | Y               | 1012                                | 14                                     |
| Z4  | 19/01-20/01 | Jan   | 18:40  | 05:32   | 34.2                     | 23.1                     | 28.7                     | 80                   | 38                   | Convex waning   | N               | 1019                                | 128                                    |
| Z5  | 02/02-03/02 | Fev   | 18:38  | 05:41   | 27.4                     | 21.5                     | 24.5                     | 99                   | 69                   | Crescent        | N               | 1015                                | 52                                     |
| Z6  | 24/02-25/02 | Fev   | 18:28  | 05:51   | 25.3                     | 21.4                     | 23.4                     | 99                   | 77                   | waning          | N               | 1018                                | 189                                    |
| Z7  | 10/03-11/03 | Mar   | 18:15  | 05:56   | 33.9                     | 22.8                     | 28.4                     | 75                   | 20                   | Quarto Crescent | N               | 1020                                | 30                                     |
| Z8  | 24/03-25/03 | Mar   | 18:03  | 06:00   | 29.6                     | 21.9                     | 25.8                     | 81                   | 52                   | Convex waning   | N               | 1020                                | 37                                     |
| Z9  | 06/04-07/04 | Abr   | 17:51  | 06:04   | 32.9                     | 24                       | 28.5                     | 76                   | 41                   | Crescent        | N               | 1018                                | 9                                      |
| Z10 | 20/04-21/04 | Abr   | 17:40  | 06:08   | 32.1                     | 19                       | 25.1                     | 82                   | 32                   | Convex waning   | N               | 1018                                | 4                                      |
| Z11 | 05/05-06/05 | Mai   | 17:31  | 06:13   | 26.6                     | 18.2                     | 22.4                     | 99                   | 72                   | Crescent        | N               | 1019                                | 10                                     |
| Z12 | 18/05-19/05 | Mai   | 17:26  | 06:18   | 21.8                     | 8.2                      | 15                       | 74                   | 27                   | Convex waning   | N               | 1015                                | 0                                      |
| Z13 | 01/06-02/06 | Jun   | 17:23  | 06:24   | 29.6                     | 17.7                     | 23.7                     | 99                   | 45                   | Crescent        | N               | 1019                                | 2                                      |
| Z14 | 15/06-16/06 | Jun   | 17:24  | 06:28   | 25.8                     | 11.3                     | 18.6                     | 99                   | 39                   | Convex waning   | N               | 1019                                | 1                                      |
| Z15 | 28/06-29/06 | Jun   | 17:27  | 06:31   | 25.8                     | 10.9                     | 18.4                     | 91                   | 40                   | new             | N               | 1021                                | 0                                      |
| Z16 | 13/07-14/07 | Jul   | 17:32  | 06:31   | 29.2                     | 16.3                     | 22.8                     | 83                   | 29                   | Convex waning   | N               | 1023                                | 2                                      |
| Z17 | 27/07-28/07 | Jul   | 17:37  | 06:27   | 28.9                     | 12.9                     | 20.9                     | 85                   | 30                   | waning          | N               | 1022                                | 1                                      |
| Z18 | 10/08-11/08 | Ago   | 17:41  | 06:20   | 26.3                     | 13.5                     | 19.9                     | 68                   | 43                   | Crescent        | N               | 1020                                | 0                                      |
| Z19 | 25/08-26/08 | Ago   | 17:45  | 06:09   | 29.6                     | 18                       | 23.8                     | 73                   | 34                   | lua minguante   | N               | 1025                                | 3                                      |
| Z20 | 05/09-06/09 | Set   | 17:48  | 05:59   | 29.6                     | 18                       | 23.8                     | 71                   | 39                   | Crescent        | N               | 1026                                | 0                                      |
| Z21 | 22/09-23/09 | Set   | 17:51  | 05:44   | 27.5                     | 20.3                     | 23.9                     | 91                   | 63                   | waning          | Y               | 1015                                | 0                                      |
| Z22 | 06/10-07/10 | Out   | 17:55  | 05:31   | 33.9                     | 20.5                     | 27.2                     | 91                   | 41                   | Crescent        | N               | 1018                                | 9                                      |
| Z23 | 19/10-20/10 | Out   | 17:59  | 05:21   | 32.5                     | 21.5                     | 27                       | 81                   | 37                   | minguante       | Y               | 1019                                | 2                                      |
| Z24 | 03/11-04/11 | Nov   | 18:05  | 05:12   | 21                       | 16.4                     | 18.7                     | 75                   | 65                   | Crescent        | Y               | 1022                                | 3                                      |
| Z25 | 17/11-18/11 | Nov   | 18:14  | 05:07   | 32.9                     | 19.9                     | 26.4                     | 73                   | 41                   | waning          | N               | 1020                                | 9                                      |

**Table S2.** Information on the nearby enclosure of each trap and the amount of captured *Culicoides* spp. in each one.

| Trap | Nearby enclosure                                 | Total of captured <i>Culicoides</i> spp |
|------|--------------------------------------------------|-----------------------------------------|
| A1   | camel and llama                                  | 198                                     |
| A2   | fallow deer, red deer, marsh deer, and oryx      | 36                                      |
| A3   | fallow deer, red deer, marsh deer, and oryx      | 63                                      |
| A4   | tapirs, lowland paca, giant anteaters, and rheas | 39                                      |
| A5   | waterbuck and zebra                              | 124                                     |
| A6   | elephants and white rhinoceros                   | 108                                     |

**Table S3.** Information on *Culicoides* spp. species and groups in relation to gender and gonadotropic stage, collected at FPMZB-BH during the period from December 2021 to November 2022.

| <i>Culicoides</i> spp. species                                    | Male      | Nulliparous | Engorged  | Gravid    | Parous     | Total      |
|-------------------------------------------------------------------|-----------|-------------|-----------|-----------|------------|------------|
| <i>Culicoides</i> of the <i>guttatus</i> group (Coquillett), 1904 | 0         | 2           | 1         | 0         | 2          | 5          |
| <i>Culicoides venezuelensis</i> Ortíz & Mirsa, 1950               | 0         | 1           | 0         | 2         | 9          | 12         |
| <i>Culicoides debilipalpis</i> Lutz, 1913                         | 8         | 0           | 3         | 0         | 6          | 17         |
| <i>Culicoides foxi</i> Ortiz, 1950                                | 1         | 0           | 0         | 0         | 17         | 18         |
| <i>Culicoides</i> of the <i>Limai</i> group                       | 4         | 8           | 3         | 1         | 7          | 23         |
| <i>Culicoides pusillus</i> Lutz, 1913                             | 7         | 5           | 5         | 1         | 14         | 32         |
| <i>Culicoides paraensis</i> (Goeldi), 1905                        | 2         | 4           | 6         | 1         | 22         | 35         |
| <i>Culicoides insignis</i> Lutz, 1913                             | 5         | 136         | 42        | 22        | 221        | 426        |
| <b>Total</b>                                                      | <b>27</b> | <b>156</b>  | <b>60</b> | <b>27</b> | <b>298</b> | <b>568</b> |

**Table S4.** Information on *Culicoides* spp. species and groups collected at FPMZB-BH during the period from December 2021 to November 2022, in relation to each month of collection.

| <i>Culicoides</i> spp. species                                    | Jan        | Feb        | Mar       | Apr       | May       | Jun      | Jul      | Aug      | Sep      | Oct       | Nov       | Dec       | Total      |
|-------------------------------------------------------------------|------------|------------|-----------|-----------|-----------|----------|----------|----------|----------|-----------|-----------|-----------|------------|
| <i>Culicoides</i> of the <i>guttatus</i> group (Coquillett), 1904 | 0          | 2          | 0         | 0         | 0         | 0        | 0        | 0        | 0        | 1         | 0         | 2         | 5          |
| <i>Culicoides venezuelensis</i> Ortíz & Mirsa, 1950               | 2          | 2          | 0         | 0         | 0         | 0        | 0        | 2        | 0        | 1         | 0         | 5         | 12         |
| <i>Culicoides debilipalpis</i> Lutz, 1913                         | 0          | 4          | 0         | 0         | 0         | 0        | 0        | 0        | 0        | 7         | 5         | 1         | 17         |
| <i>Culicoides foxi</i> Ortiz, 1950                                | 1          | 10         | 7         | 0         | 0         | 0        | 0        | 0        | 0        | 0         | 0         | 0         | 18         |
| <i>Culicoides</i> of the <i>Limai</i> group                       | 5          | 6          | 3         | 4         | 0         | 0        | 0        | 0        | 0        | 0         | 1         | 4         | 23         |
| <i>Culicoides pusillus</i> Lutz, 1913                             | 20         | 6          | 5         | 0         | 0         | 0        | 0        | 0        | 0        | 0         | 0         | 1         | 32         |
| <i>Culicoides paraensis</i> (Goeldi), 1905                        | 18         | 6          | 3         | 1         | 0         | 0        | 2        | 0        | 0        | 2         | 1         | 2         | 35         |
| <i>Culicoides insignis</i> Lutz, 1913                             | 96         | 205        | 49        | 9         | 10        | 3        | 1        | 1        | 0        | 0         | 5         | 47        | 426        |
| <b>Total</b>                                                      | <b>142</b> | <b>241</b> | <b>67</b> | <b>14</b> | <b>10</b> | <b>3</b> | <b>3</b> | <b>3</b> | <b>0</b> | <b>11</b> | <b>12</b> | <b>62</b> | <b>568</b> |

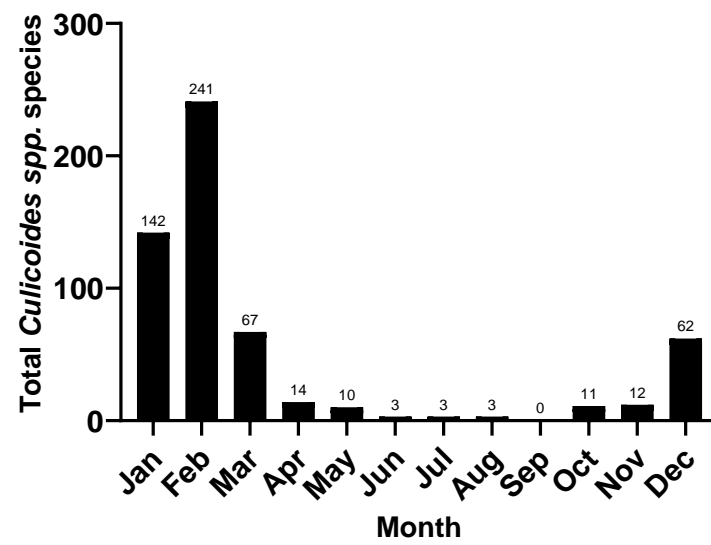

**Figure S1.** Graph depicting the total number of *Culicoides* spp. collected at FPMZB-BH for each month of the project.

**Table S5.** Statistical analysis of the variables involving the *Culicoides spp.* captures.

| Variable                                                                    |              | Univariate analysis    |         | Multivariate analysis  |         |
|-----------------------------------------------------------------------------|--------------|------------------------|---------|------------------------|---------|
|                                                                             |              | RR (95%)               | p-Value | RR (95%)               | p-Value |
| Maximum temperature                                                         |              | 1.01 (0.92 - 1.22)     | 0.778   | -                      | -       |
| Minimum temperature                                                         |              | 1.69 (1.47 - 1.94)     | 0.000*  | -                      | -       |
| Average temperature                                                         | 15 to 20°C   | 1.26 (1.09 - 1.46)     | 0.002*  | -                      | -       |
|                                                                             | 25.1 to 30°C | 4.5 (0.30 – 66.42)     | 0.273   | -                      | -       |
| Temperature ranges                                                          |              | 83.7 (9.30 – 752.96)   | 0.000*  | -                      | -       |
| Maximum humidity                                                            |              | 1.06 (1.01 - 1.10)     | 0.007*  | -                      | -       |
| Minimum humidity                                                            |              | 1.04 (1.01 - 1.06)     | 0.001*  | -                      | -       |
| Medium humidity                                                             |              | 1.04 (1.01 - 1.07)     | 0.002*  | -                      | -       |
| lunar phase                                                                 |              | 1.77 (0.83 - 3.75)     | 0.138   | -                      | -       |
| Lunar luminosity rate                                                       |              | 1.00 (0.99 - 1.02)     | 0.416   | -                      | -       |
| Collections on days without rain (Precipitation)                            |              | 5.44 (1.89 - 15.66)    | 0.002*  | 5.18 (2.00- 13.42)     | 0.001*  |
| Traps set outside the enclosure compared to those set inside the enclosures |              | 2.34 (1.07 - 5.12)     | 0.034*  | -                      | -       |
| Water sources near traps                                                    |              | 2.70 (1.03 - 7.08)     | 0.044*  | -                      | -       |
| Nearby vegetation                                                           |              | 0.99 (038 - 2.57)      | 0.979   | -                      | -       |
| Trap locations **                                                           | 1            | 5.47 (1.59 - 18.85)    | 0.007*  | -                      | -       |
|                                                                             | 3            | 1.75 (0.50 - 6.13)     | 0.381   | -                      | -       |
|                                                                             | 4            | 1.08 (0.30 - 3.85)     | 0.902   | -                      | -       |
|                                                                             | 5            | 3.44 (1.00 - 11.92)    | 0.051*  | -                      | -       |
|                                                                             | 6            | 2.86 (0.82 - 9.92)     | 0.098   | -                      | -       |
|                                                                             |              |                        |         |                        |         |
| Presence of accumulation of feces near traps                                |              | 3.07 (1.50 - 6.30)     | 0.002*  | 2.56 (1.57- 4.18)      | 0.000*  |
| Month ***                                                                   | January      | 68.51 (15.95 - 294.18) | 0.000*  | 92.65 (22.30 – 384.92) | 0.000*  |
|                                                                             | February     | 120.50 (28.18- 515.31) | 0.000*  | 116.3 (29.47 – 459.17) | 0.000*  |
|                                                                             | March        | 33.50 (7.72 - 145.30)  | 0.000*  | 31.17 (7.77 – 125.06)  | 0.000*  |
|                                                                             | April        | 6.50 (1.38 - 30.51)    | 0.018*  | 6.05 (1.38 – 16.55)    | 0.017*  |
|                                                                             | May          | 5.00 (1.04 - 24.15)    | 0.045*  | 5.24 (1.15 - 23.75)    | 0.032*  |
|                                                                             | July         | 1.50 (0.24 - 9.42)     | 0.665   | 1.50 (0.25 – 8.98)     | 0.654   |
|                                                                             | August       | 1.50 (0.24 - 9.42)     | 0.665   | 1.41 (0.24 – 8.44)     | 0.703   |
|                                                                             | September    | 1.42 (0)               | 0.982   | 1.14 (0)               | 0.992   |
|                                                                             | October      | 5.50 (1.15 - 26.27)    | 0.033*  | 9.54 (1.99 – 45.55)    | 0.005*  |
|                                                                             | November     | 6.00 (1.27 - 28.39)    | 0.024*  | 12.50 (2.61 – 59.79)   | 0.002*  |
|                                                                             | December     | 31.00 (7.14 - 134.67)  | 0.000*  | 30.62 (7.61 – 123.23)  | 0.000*  |

\* Significant results  $p < 0.05$ .\*\* Trap 2 was used to compare all traps as it was the one with the lowest number of *Culicoides* captured, thus being omitted from the table.

\*\*\* June was used to compare the months, thus it was omitted from the table.
